# Supplementary material for: Anti-saccades predict cognitive functions in older adults and patients with Parkinson’s disease
Source: PLoS One. 2018 Nov 28;13(11):e0207589. doi: 10.1371/journal.pone.0207589 (PMC6261587; doi:10.1371/journal.pone.0207589)
Supplement: S1 File — Data shows mean per participant. Missing or non-applicable data is indicated by a dot. Anti, anti-saccade; DT, decision time, ER, error rate; MoCA, Montreal cognitive assessment; MMSE, Mini- Mental State examination; ms; milliseconds; pro, pro-saccade; SRT, saccade reaction time; ST, search time; y, year. (XLSX) [file pone.0207589.s002.xlsx]

## Sheet: Feuil1
	Subject ID	Age (y)	MoCA	MMSE	Pro ER (%)	Anti ER (%)	Pro SRT (ms)	Anti SRT (ms)	Memory % correct	Pop-out ST (ms)	Serial ST (ms)	DT (ms)
Younger adults
	1	21	.	.	.	.	.	.	90.91	740.65	1111.65	1218.75
	2	22	.	.	3	15.79	243	310	91.61	697.61	1063.86	1385.22
	3	23	.	.	0	26.67	189	306	86.18	622.1	807.18	1324.25
	4	27	.	.	7	28.57	236	321	92.2	771.84	1156.93	1080.38
	5	26	.	.	.	.	.	.	85.71	660.32	1119.4	2114.45
	6	22	.	.	5	6.06	258	337	94	.	1083.2	860.75
	7	21	.	.	8	10	335	315	83.33	567.01	961.55	1215.41
	8	37	.	.	.	.	.	.	87.64	448.75	815.25	813.61
	9	21	.	.	3	3.45	207	298	88.13	735.86	1143.8	806.06
	10	21	.	.	.	.	.	.	76.11	463.98	928.25	866.43
	11	24	.	.	0	5.56	352	410	95.68	788.47	1268.87	1030.38
	12	28	.	.	17	10.26	316	376	89.17	699.84	1213.21	1529.81
	13	22	.	.	8	23.08	248	381	85	645.19	1548.79	1107.98
	14	20	.	.	5	8.82	270	306	84.77	693.62	1216.83	1152.75
	15	21	.	.	3	31.03	258	387	86.79	983.25	1375	1528.41
	16	22	.	.	7	4.76	210	272	95.74	777.23	1143.65	900.17
	17	22	.	.	5	13.89	219	322	91.98	584.2	958.87	749.82
	18	21	.	.	10	18.18	238	478	91.88	769.83	1753.65	1622.1
	19	20	.	.	31	57.69	206	248	83.23	641.12	1332.23	1013.53
	20	21	.	.	0	3.03	194	233	92.59	591.51	797.61	2027.97
	21	21	.	.	5	19.05	161	192	95.63	509.95	792.6	890.29
	22	21	.	.	3	2.94	166	248	87.23	763.84	897.81	.
	23	19	.	.	0	25.71	208	312	88.68	431.84	749.77	627.59
	24	21	.	.	5	18.75	202	266	86.54	445.16	721.59	606.92
	25	22	.	.	5	8.33	241	294	92.5	484.57	801.62	853.77
	26	22	.	.	0	17.65	279	372	82.35	527.41	1077.12	839.5
	27	22	.	.	0	25.81	145	245	94	720.3	1282.11	1527.3
	28	24	.	.	4	0	259	276	78.57	528.29	1109.15	909.42
	29	22	.	.	6	10	211	255	92.09	664.93	931.6	1055.55
	30	19	.	.	0	17.65	137	218	89.81	563.11	874.19	577.79
	31	19	.	.	0	27.27	265	365	87.5	647.14	1095.33	957.07
	32	24	.	.	6	24.24	490	500	91.78	579.81	983.04	1064.73
	33	33	.	.	0	19.44	159	248	80.89	609.11	849.08	617.74
	34	22	.	.	.	.	.	.	77.62	544.3	836.42	1218.13
PD patients
	1	77	25	30	0	66.67	294	575	61.39	1198.13	1965.58	1962.34
	2	69	25	30	.	.	.	.	79.34	1518.96	2661.59	3071.88
	3	69	25	28	4	16.67	269	432	87.34	1012.58	1443.44	1020.4
	4	85	27	29	6	25.64	253	412	77.78	913.94	1809.85	1181.74
	5	59	25	30	2	23.4	236	378	83.95	636.41	962.1	1448.59
	6	69	29	28	0	5.88	284	362	84.38	670	1639.75	1005.08
	7	54	23	25	0	83.64	229	541	77.02	929.53	1885.74	2173.61
	8	62	26	28	0	1.75	205	271	83.95	686.61	1456.54	1165.24
	9	54	25	30	2	7.41	227	252	86.42	831.63	1353.4	918.88
	10	69	27	30	0	14.55	239	316	85.16	828.27	1731.98	1182.67
	11	53	28	30	0	0	197	256	84.87	711.58	1435.75	1173.06
	12	74	29	30	0	39.29	204	267	80.65	833.74	1429.6	977.78
	13	64	28	30	5	20	274	268	87.5	880.79	1605.04	837.03
	14	67	28	30	.	.	.	.	78.95	.	.	3050.52
	15	74	23	28	.	.	.	.	56.04	1349.74	2657.88	2243.45
	16	66	23	29	33	73.33	335	343	69.81	1076.51	2088.45	1561.21
	17	66	27	29	.	.	.	.	79.25	807.75	1886.92	1377.23
	18	68	23	27	0	38.46	318	454	62.63	.	2235.56	2284.2
	19	70	26	30	0	40.63	251	360	87.04	778.36	1461.57	1597.5
	20	79	28	30	.	.	.	.	60.19	1346.85	2050.19	3252.52
Older adults
	1	56	30	29	13	16.22	263	311	76.47	691.87	1218.26	1227.45
	2	63	29	29	8	17.14	172	246	91.98	748.07	1245.4	896.57
	3	71	25	30	7	40	292	431	81.88	834.56	1525.9	1431.13
	4	53	29	29	3	3.2	196	231	85.8	650.89	1031.34	1104
	5	68	29	30	0	20	226	309	80.75	702.06	1673.75	824.68
	6	67	29	29	.	.	.	.	86.88	695.43	979.95	1242.44
	7	65	25	30	0	68.18	259	398	77.02	679.71	1262.4	1173.72
	8	68	27	30	0	54.29	213	333	80.29	719.68	1489.77	1066.15
	9	69	27	25	3	20.59	259	322	81.25	807.81	1755.67	1527.78
	10	52	30	29	22	23.68	237	311	87.65	822.58	1466.45	1580.42
	11	61	24	25	0	3.23	156	250	78.62	720.72	1745.61	889.66
	12	66	27	29	11	12	291	377	79.38	668.31	1160.24	875.44
	13	73	30	29	9	5.26	362	303	80.25	756.49	1620.68	962.75
	14	63	30	30	0	52.38	226	452	88.27	730.91	1628.54	2131.98
	15	72	30	26	0	50	205	331	83.33	738.6	1539.18	1029.89
	16	83	27	27	0	22.64	390	557	83.33	945.92	1661.94	1117
	17	58	29	27	4	32	182	355	78.88	852.42	1581.07	787.41
	18	60	30	29	0	6.67	263	292	82.72	658.97	1108.21	1482
	19	75	24	27	2	17.39	199	275	85.09	611.75	1261.64	800.89
	20	59	30	30	0	68.42	213	456	79.63	695.69	1144.93	1054.2
	21	60	30	28	51	47.37	210	256	82.1	717.58	1072.59	1232.23
	22	81	24	26	0	91.3	327	526	67.52	.	.	2806.18
